# Supplementary material
Source: PubMed Central journal article supplement (PMC3388209)
Supplement: mmc1.pdf [file mmc1.pdf]

# Dynamical coupling of intrinsically disordered proteins and their hydration water: comparison to folded soluble and membrane proteins

F.-X. Gallat, A. Laganowsky, K. Wood, F. Gabel, L. van Eijck, J. Wuttke, M. Moulin, M. Härtlein, D. Eisenberg, J.-P. Colletier, G. Zaccai & M. Weik

## Supporting Material

### SAXS intensity profile $I(Q)$ of H-tau in solution

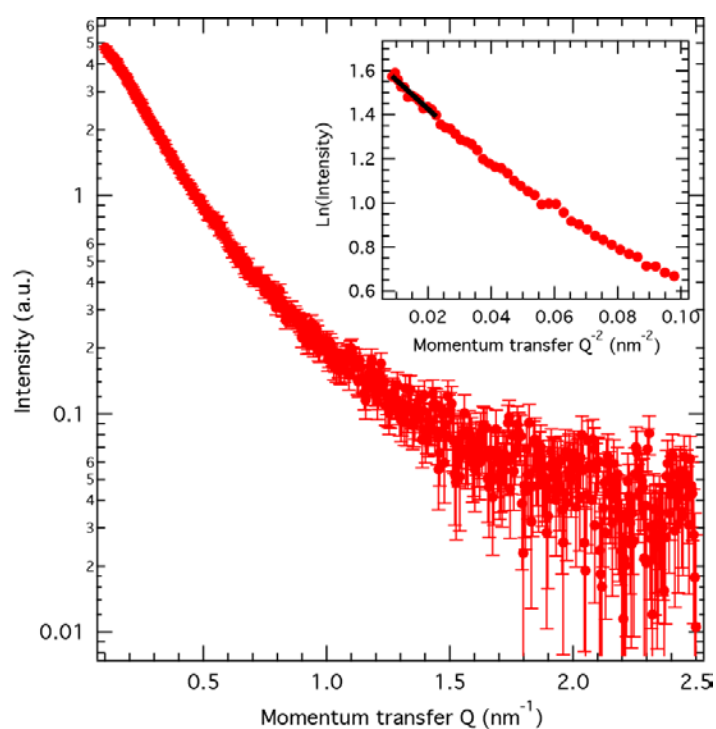

**Legend Figure S1:** Small angle X-ray scattering curve of H-tau in solution. The inset shows the Guinier fit used for the extraction of  $R_g$ .

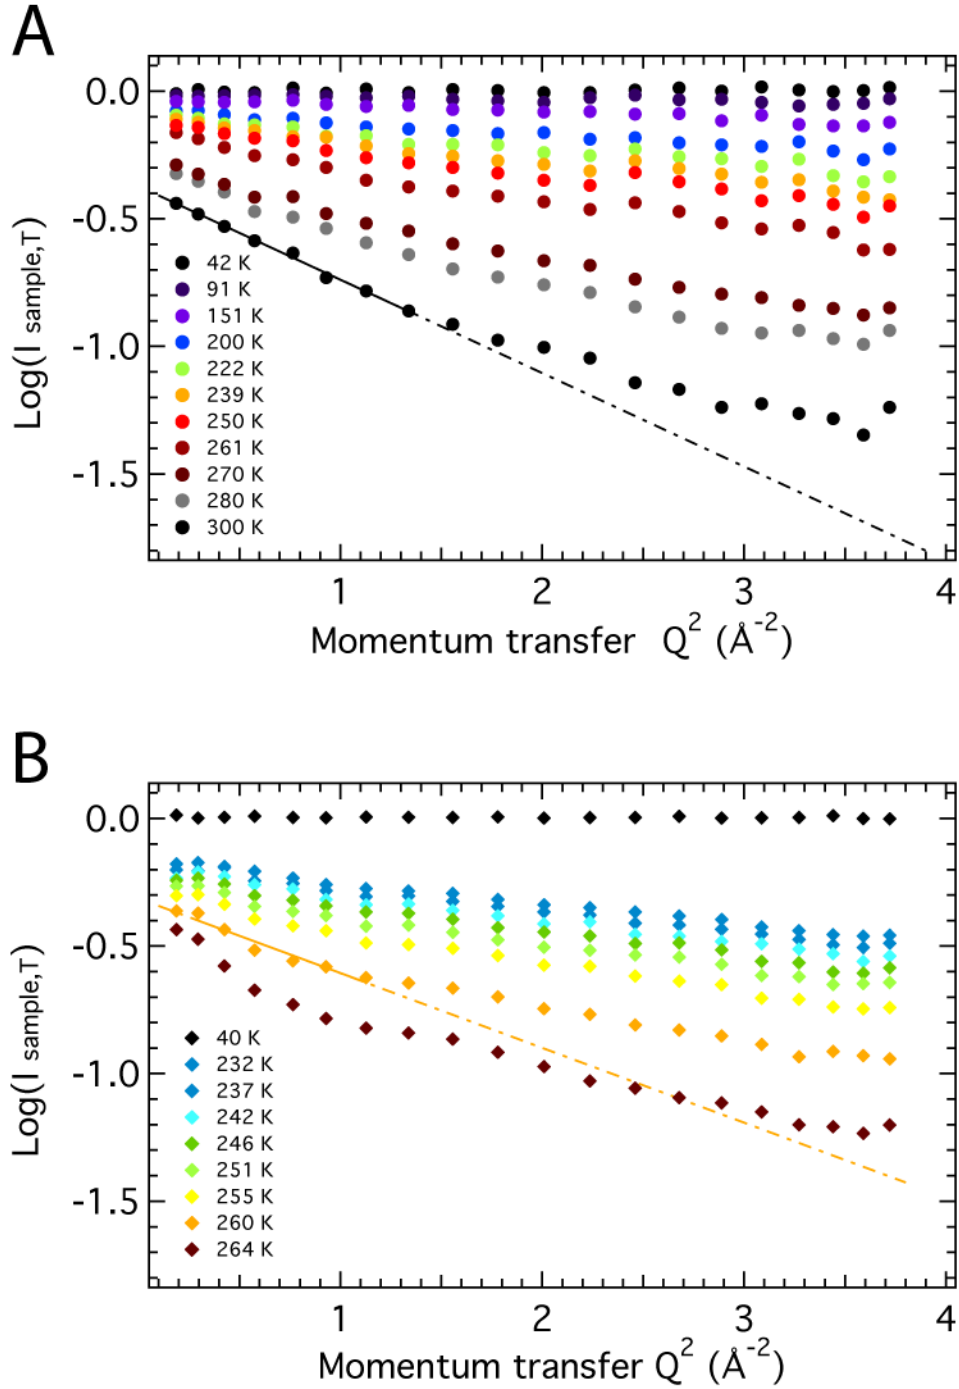

**Legend Figure S2:** Logarithmic representation of the normalised intensities (eq. 1 in main text) as a function of  $Q^2$  at various temperatures for H-tau-D<sub>2</sub>O (A) and D-tau-H<sub>2</sub>O (B). The  $Q^2$  ranges in which MSD were extracted are  $0.19 \text{ \AA}^{-2} < Q^2 < 1.32 \text{ \AA}^{-2}$  for the H-tau-D<sub>2</sub>O (A) and  $0.19 \text{ \AA}^{-2} < Q^2 < 1.13 \text{ \AA}^{-2}$  for D-tau-H<sub>2</sub>O (B). They are indicated by solid lines for the highest temperature at which a linear relationship is still observed, *i.e.* 300 K for H-tau-D<sub>2</sub>O (A) and 260 K for D-tau-H<sub>2</sub>O (B). In (B),  $\ln(I)$  versus  $Q^2$  is not linear any more at 263 K. Consequently, MSD of D-tau-H<sub>2</sub>O are only shown up to 260 K in figs. 1B and 4A of the main text. Broken lines are extrapolations of solid lines.

## Reproducibility of incoherent elastic neutron scattering on the IN16 spectrometer at the ILL

In order to assess the reproducibility of incoherent elastic neutron scattering on IN16, the elastic scan on H-tau-D<sub>2</sub>O (0.44 g D<sub>2</sub>O / g H-tau) was repeated with the same sample and in exactly the same experimental conditions on IN16. Figure S3 indicates a high degree of reproducibility and gives an idea of experimental and statistical errors involved.

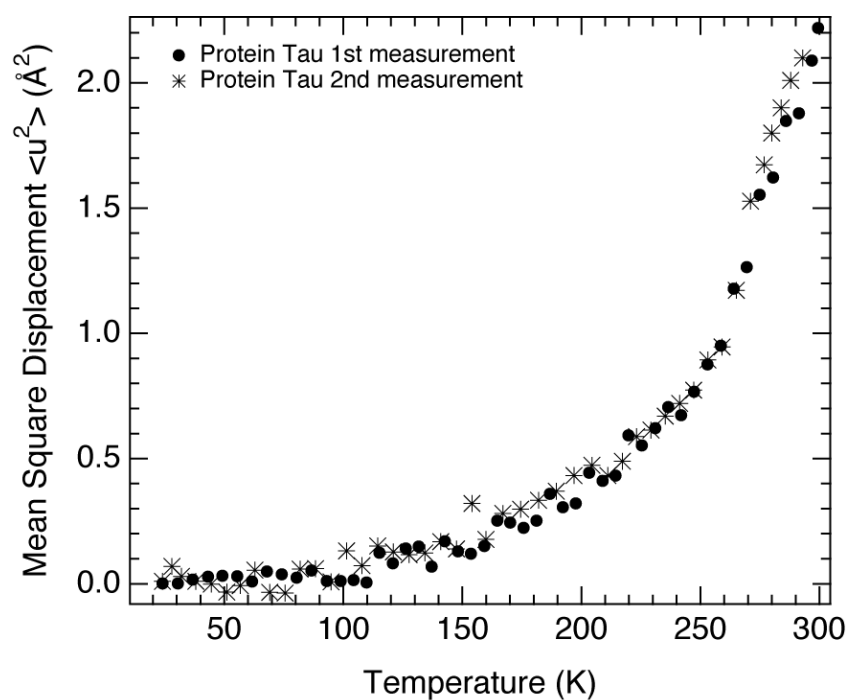

**Legend Figure S3:** Mean square displacements of H-tau-D<sub>2</sub>O (0.44 g D<sub>2</sub>O / g H-tau) determined from two independent measurements on IN16. Filled circles correspond to MSD shown in figures 1A and 4A and stars are from the repeated experiment.

## Incoherent neutron scattering experiments on the SPHERES spectrometer at FRMII

With the aim of comparing IN16 at ILL (Grenoble, France) with the similar backscattering spectrometer SPHERES ((1); [http://www.jcms.info/jcms\\_spheres](http://www.jcms.info/jcms_spheres); Jülich Centre for Neutron Science at FRMII, Garching, Germany) at FRMII (Garching, Germany), we performed elastic incoherent neutron scattering experiments on SPHERES with the same D-tau-H<sub>2</sub>O sample than the one used on IN16. SPHERES is characterized by an energy resolution of 0.6  $\mu\text{eV}$  (FWHM), a wavelength of 6.27  $\text{Å}$  and an accessible  $Q$  range of 0.2 - 1.9  $\text{Å}^{-1}$ . The D-tau-H<sub>2</sub>O sample was inserted in a Janis Cryostat/Cryofurnace at room temperature and at 135° with respect to the incoming beam. The temperature was lowered to 20 K in 2 hours and elastic scans were performed during temperature raise from 20 K to 300 K at 0.13 K / min. MSD were extracted from normalized intensities in the  $Q$  range from 0.2 to 1.22  $\text{Å}^{-2}$  as described in the Materials and Methods sections of the main text. Data analysis was carried out with LAMP. Despite slightly different  $Q$ -ranges over which MSD were extracted, due to slightly different instrument characteristics (0.2 to 1.22  $\text{Å}^{-2}$  on SPHERES and 0.19 to 1.13  $\text{Å}^{-2}$  on IN16), results are comparable (figure S4).

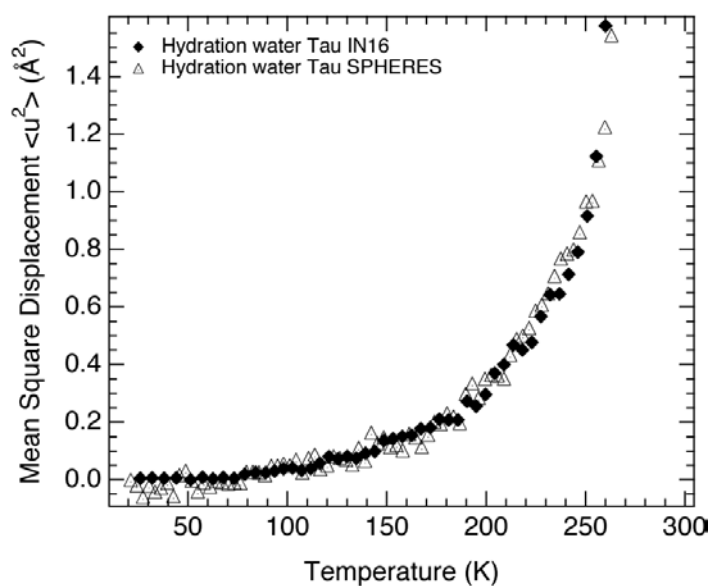

**Legend Figure S4:** MSD of D-tau-H<sub>2</sub>O as measured on IN16 (closed diamonds) and SPHERES (open triangles). Data points represented by closed diamonds are the same as those in figure 1B.

## Supporting References

1. Wuttke, J., A. Budwig, M. Drochner, H. Kämmerling, F.-J. Kayser, H. Kleines, L. C. Pardo, M. Prager, V. Ossovyi, G. J. Schneider, H. Schneider, S. Staringer, and D. Richter. 2012. SPHERES, Jülich's High-Flux Neutron Backscattering Spectrometer at FRM II. *Rev. Sci. Instr.* submitted (arXiv:1204.3415v3).
